# Supplementary material for: An Interplay of S-Nitrosylation and Metal Ion Binding for Astrocytic S100B Protein
Source: PubMed Central journal article supplement (PMC4861259; doi:10.1371/journal.pone.0154822), 2016-05-09

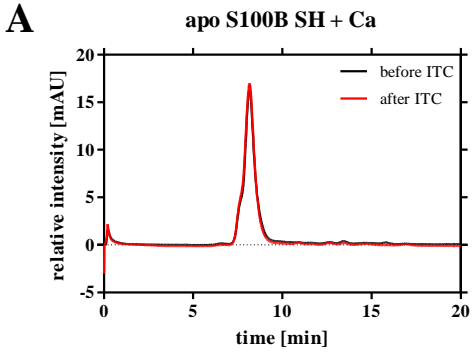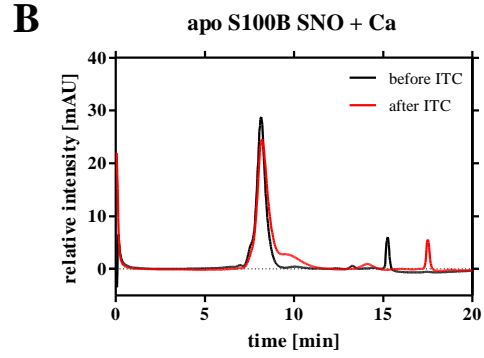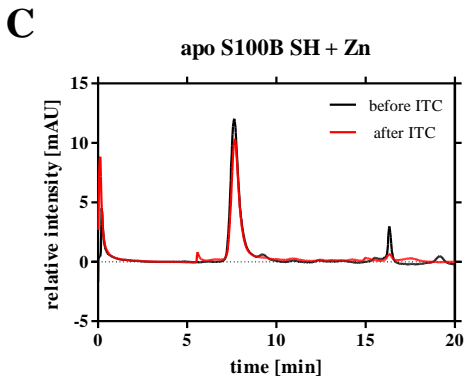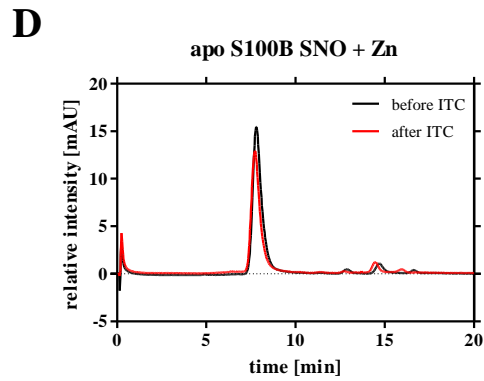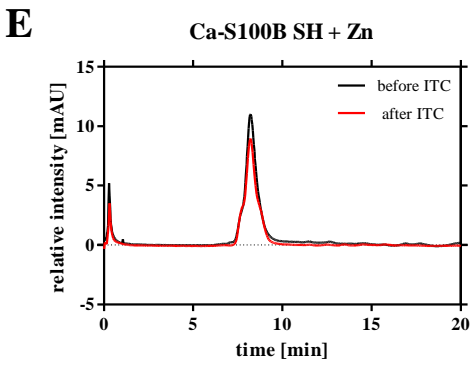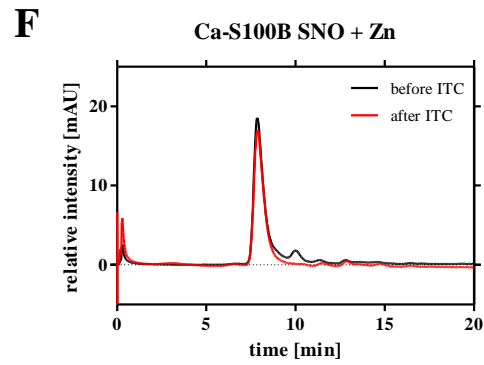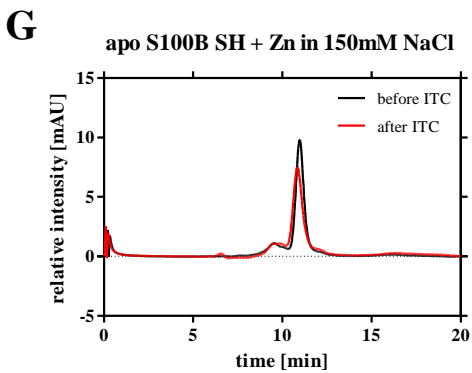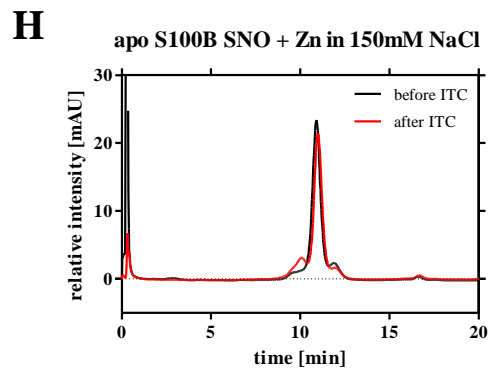

Supplement: pone.0154822.s006.pdf [file pone.0154822.s006.pdf]
